RESEARCH ARTICLE

# Mitochondrial Haplogroup T Is Associated with Obesity in Austrian Juveniles and Adults

Sabine Ebner<sup>1</sup>, Harald Mangge<sup>2,3</sup>, Helmut Langhof<sup>4</sup>, Martin Halle<sup>5,9,10</sup>, Monika Siegrist<sup>5</sup>, Elmar Aigner<sup>6,7</sup>, Katharina Paulmichl<sup>1,7</sup>, Bernhard Paulweber<sup>6</sup>, Christian Datz<sup>8</sup>, Wolfgang Sperl<sup>1</sup>, Barbara Kofler<sup>1</sup>, Daniel Weghuber<sup>1,7\*</sup>

**1** Department of Pediatrics, Paracelsus Medical University, Salzburg, Austria, **2** Clinical Institute for Medical and Chemical Laboratory Diagnostics, Medical University Graz, Graz, Austria, **3** BioTechMed-Graz, Graz, Austria, **4** Klinik Schönsicht, Berchtesgaden, Germany, **5** Department of Prevention, Rehabilitation and Sports Medicine, Klinikum rechts der Isar, Technische Universität München, Munich, Germany, **6** Department of Internal Medicine, Paracelsus Medical University, Salzburg, Austria, **7** Obesity Research Unit, Paracelsus Medical University and Salzburger Landeskliniken, Salzburg, Austria, **8** Department of Internal Medicine, General Hospital Oberndorf, Oberndorf, Austria, **9** DZHK (German Centre for Cardiovascular Research), partner site Munich Heart Alliance, Munich, Germany, **10** Else Kröner-Fresenius-Zentrum, Klinikum rechts der Isar, Munich, Germany

\* [d.weghuber@salk.at](mailto:d.weghuber@salk.at)

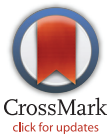

**OPEN ACCESS**

**Citation:** Ebner S, Mangge H, Langhof H, Halle M, Siegrist M, Aigner E, et al. (2015) Mitochondrial Haplogroup T Is Associated with Obesity in Austrian Juveniles and Adults. *PLoS ONE* 10(8): e0135622. doi:10.1371/journal.pone.0135622

**Editor:** Dan Mishmar, Ben-Gurion University of the Negev, ISRAEL

**Received:** April 1, 2015

**Accepted:** July 24, 2015

**Published:** August 31, 2015

**Copyright:** © 2015 Ebner et al. This is an open access article distributed under the terms of the [Creative Commons Attribution License](https://creativecommons.org/licenses/by/4.0/), which permits unrestricted use, distribution, and reproduction in any medium, provided the original author and source are credited.

**Data Availability Statement:** All relevant data are within the paper and its Supporting Information files.

**Funding:** This study was supported by a start-up research grant by the German Society of Paediatric Gastroenterology, Hepatology and Nutrition (GPGE) to Daniel Weghuber ([www.gpge.de](http://www.gpge.de)). Daniel Weghuber and Katharina Paulmichl would like to acknowledge support by a grant from the European Commission (FP7 contract 279153, Beta-JUDO; <http://www.cordis.europa.eu/fp7>), and a grant by the "Gesellschaft zur Förderung Pädiatrischer Forschung und Fortbildung" at the Department of Pediatrics, Paracelsus Medical University ([www.salk.at](http://www.salk.at)). Elmar

## Abstract

### Background

Recent publications have reported contradictory data regarding mitochondrial DNA (mtDNA) variation and its association with body mass index. The aim of the present study was to compare the frequencies of mtDNA haplogroups as well as control region (CR) polymorphisms of obese juveniles ( $n = 248$ ) and obese adults ( $n = 1003$ ) versus normal weight controls ( $n_{\text{juvenile}} = 266$ ,  $n_{\text{adults}} = 595$ ) in a well-defined, ethnically homogenous, age-matched comparative cohort of Austrian Caucasians.

### Methodology and Principal Findings

Using SNP analysis and DNA sequencing, we identified the nine major European mitochondrial haplogroups and CR polymorphisms. Of these, only the T haplogroup frequency was increased in the juvenile obese cohort versus the control subjects [11.7% in obese vs. 6.4% in controls], although statistical significance was lost after adjustment for sex and age. Similar data were observed in a local adult cohort, in which haplogroup T was found at a significantly higher frequency in the overweight and obese subjects than in the normal weight group [9.7% vs. 6.2%,  $p = 0.012$ , adjusted for sex and age]. When all obese subjects were considered together, the difference in the frequency of haplogroup T was even more clearly seen [10.1% vs. 6.3%,  $p = 0.002$ , OR (95% CI) 1.71 (1.2–2.4), adjusted for sex and age]. The frequencies of the T haplogroup-linked CR polymorphisms C16294T and the C16296T were found to be elevated in both the juvenile and the adult obese cohort compared to the controls. Nevertheless, no mtDNA haplogroup or CR polymorphism was robustly associated with any of several investigated metabolic and cardiovascular parameters (e.g., blood pressure, blood glucose concentration, triglycerides, cholesterol) in all obese subjects.

Aigner is supported by PMU-Forschungsförderungsfonds (E-13/17/086-AIG; [www.pmu.ac.at](http://www.pmu.ac.at)). The funders had no role in study design, data collection and analysis, decision to publish, or preparation of the manuscript.

**Competing Interests:** The authors have declared that no competing interests exist.

## Conclusions and Significance

By investigation of this large ethnically and geographically homogenous cohort of Middle European Caucasians, only mtDNA haplogroup T was identified as an obesity risk factor.

## Introduction

The heritability of obesity has long been appreciated. Early studies focused on monogenic and syndromal forms of extreme obesity, while subsequent genome-wide association studies (GWAS) of common genetic variants have identified novel loci. However, the common variants uncovered in the latter studies were found to have modest effects (per-allele odds ratios between 1.2 and 1.5), and the proportion of variability explained by the GWAS-identified loci to date remains relatively small (<10%) [1]. The heritability of obesity-related phenotypes may have been overestimated, as the effects of a shared environment are difficult to separate from inherited influences. Thus, several approaches are being used to explain the missing genetic heritability.

Given the essential function of mitochondria in energy metabolism, it seems plausible that mitochondrial dysfunction could play a role in obesity and its associated comorbidities [2–4]. A study of children with a suspected disorder of oxidative phosphorylation (OXPHOS) found a significant correlation between mitochondrial energy production and age-related body mass index (BMI) [4]. A Finnish study of identical twins who were either concordant or discordant for obesity showed that, independent of genetic factors, obesity was associated with poor fitness, low insulin sensitivity, and decreased transcript levels of genes involved in mitochondrial OXPHOS pathways [5]. Only a few studies have used large population samples to test the hypothesis that genetic variants in mtDNA might contribute to susceptibility to obesity, but they yielded conflicting results [6–9] (Table 1). It has long been recognized that certain morbidities are more prevalent in specific racial/ethnic populations [10–12]. Recently, striking geographic variation was shown for mtDNA [13, 14]. Thus, the quality of the sampling procedure is crucial to ensure the validity of the qualitative and quantitative results obtained from analysis of mtDNA.

Whether mtDNA haplogroups contribute to obese phenotypes remains an unanswered question. To address this issue, the present study critically examines mtDNA haplogroups as well as control region (CR) polymorphisms in a large, well-defined, age-matched comparative cohort study including obese and normal weight subjects from an Austrian juvenile obese cohort (STYJOBS/EDECTA [15]), a local Austrian juvenile normal-weight cohort (URSPRUNG, [16]), and an adult Austrian confirmation cohort (SAPHIR, [17]).

## Materials and Methods

### Patients and control subjects

A total of 514 Middle European Caucasian juveniles (age < 21 years) originating from two study populations was analyzed (Table 2). Siblings and subjects with other than Middle European ancestry were excluded from the study. Additionally, 1598 adults were included in our data analysis.

**1. Juvenile cohort (STYJOBS/EDECTA).** DNA samples from 248 obese juveniles were obtained from the prospective, observational study STYrian Juvenile Obesity Study/Early DEtECTION of Arteriosclerosis [15, 18] collected at the Medical University Graz, Austria. The inclusion criteria for the overweight (obese) subjects was BMI > 90<sup>th</sup> percentile if below 18

**Table 1. Literature reports of associations between mtDNA variants and obesity in different ethnicities.**

| Reference                | Population studied                                                                                         | Homogenous population sample in regard to mtDNA haplogroups | Number of samples                                       | Analyzed mtDNA variants/haplogroups                                                                                          | Results                                                                                                                                                                               |
|--------------------------|------------------------------------------------------------------------------------------------------------|-------------------------------------------------------------|---------------------------------------------------------|------------------------------------------------------------------------------------------------------------------------------|---------------------------------------------------------------------------------------------------------------------------------------------------------------------------------------|
| Yang et al. 2011 [6]     | Caucasians of Northern European origin living in Midwestern US                                             | YES                                                         | 2286 adults                                             | 72 mtDNA SNPs; 9 common European haplogroups                                                                                 | Haplogroup X, mt4823 and mt8873 associated with lower BMI and reduced body fat mass                                                                                                   |
| Grant et al. 2011 [7]    | European-Americans                                                                                         | NO                                                          | 1080 obese children, 2500 lean children                 | 138 mtDNA SNPs (including 19 haplogroup specific SNPs and 19 SNPs located in the D-loop)                                     | No association with obesity for any SNP in both ethnicities and no difference in heteroplasmy                                                                                         |
|                          | African-Americans                                                                                          |                                                             | 1479 obese children, 1575 lean children                 |                                                                                                                              |                                                                                                                                                                                       |
| Knoll et al. 2014 [8]    | Discovery GWAS sample, participants from Germany and France, no information about ethnicity available      | NO                                                          | 1158 obese children and adolescents, 453 adult controls | 35 mtDNA SNPs                                                                                                                | Association with obesity found for G8994A; haplogroup W nominally overrepresented in the controls                                                                                     |
|                          | Confirmation GWAS sample, population-based, all residents from Southern, Northern and Northeastern Germany |                                                             | 1697 obese adults, 2373 adult controls                  |                                                                                                                              | No association with obesity for any SNP or haplogroup                                                                                                                                 |
|                          |                                                                                                            |                                                             |                                                         | D-loop polymorphisms in 192 extremely obese children and 192 lean adults (mainly originating from the discovery GWAS sample) | C16292T and C16189T associated with obesity                                                                                                                                           |
| Nardelli et al. 2013 [9] | Caucasians from Southern Italy                                                                             | YES                                                         | 500 obese adults, 216 adult controls                    | 9 common European haplogroups                                                                                                | Frequency of haplogroup T higher, J lower in obese; T haplogroup was correlated to the degree of obesity; No association of haplogroups and the tested clinical/biochemical variables |

doi:10.1371/journal.pone.0135622.t001

years of age [19], and BMI > 25 kg/m<sup>2</sup> if above 18 years of age. Persons with endocrine, infectious, inflammatory or any other chronic disease were excluded from the study.

**2. Juvenile control cohort (URSPRUNG).** DNA samples from age-matched normal-weight controls were obtained from 266 students attending the Secondary School for Agriculture and Environmental Technology, Elixhausen, Salzburg [16]. The inclusion criterion for control subjects was BMI ≤ 85th percentile [19].

**Table 2. Characteristics of the study populations.**

|                                          | STYJOBS/<br>ELECTA <sup>2</sup><br>n = 248 | URSPRUNG <sup>3</sup><br>n = 266 | SAPHIR <sup>4</sup><br>obese<br>n = 1003 | SAPHIR <sup>4</sup><br>controls<br>n = 595 |
|------------------------------------------|--------------------------------------------|----------------------------------|------------------------------------------|--------------------------------------------|
| Mean (SD <sup>1</sup> ) age (years)      | 12.9 (3.1)                                 | 16.6 (1.7)                       | 51.9 (6.0)                               | 51.5 (6.2)                                 |
| Male (%)                                 | 43.5                                       | 71.1                             | 68.4                                     | 56.3                                       |
| BMI (SD <sup>1</sup> ) kg/m <sup>2</sup> | 30.3 (6.1)                                 | 20.9 (1.9)                       | 29.1 (3.5)                               | 22.9 (1.6)                                 |

1 SD: standard deviation

2 Juvenile obese cohort 1

3 Juvenile control cohort

4 Adult cohort

doi:10.1371/journal.pone.0135622.t002

**3. Adult cohort (SAPHIR).** As a confirmation sample, we recalculated the data of 1598 unrelated adult individuals recruited for the Salzburg Atherosclerosis Prevention Program [17]. Data on mitochondrial haplogroup analysis and CR polymorphisms were taken from previous studies [20–22]. For comparison of the frequencies of mtDNA haplogroups and CR polymorphisms, the SAPHIR cohort was divided into a normal-weight group ( $BMI \leq 25 \text{ kg/m}^2$ ) and an overweight and obese group ( $BMI > 25 \text{ kg/m}^2$ ).

## Ethics Statement

The study was conducted according to the Austrian Gene Technology Act and complied with the Declaration of Helsinki in its revised version of 2013. All adult participants gave written informed consent before entering the study, and parental consent was obtained for juveniles.

The STYJOBS/EDECTA program is registered at [ClinicalTrials.gov](http://ClinicalTrials.gov), Identifier NCT00482924. The URSPRUNG study, conducted as a school-based health survey project, was approved by the Austrian Ministry of Education, Science and Culture (Palais Starhemberg, Minoritenplatz, Vienna, Austria). The SAPHIR program was approved by the Local Province of Salzburg Ethics Committee ("Ethikkommission für das Bundesland Salzburg; Amt der Salzburger Landesregierung, Abteilung 9 Gesundheit und Sport").

## Mitochondrial DNA analysis

For the juvenile obese group (STYJOBS/EDECTA) and the adult SAPHIR cohort, a hierarchical system for mtDNA haplogrouping that combines multiplex PCR amplification, multiplex single-base primer extension, and capillary-based electrophoretic separation was used to assess the most common European haplogroups (H, U, J, T, K, I, V, W and X) as described previously [23]. Haplogroups that could not be assigned to one of the nine major European haplogroups by their single nucleotide polymorphism (SNP) combination were designated as 'others'. SNP analysis for haplogrouping of the juvenile control group (URSPRUNG) was performed at Sequenom GmbH Hamburg, Germany using the MALDI-TOF mass spectrometry-based iPLEX Gold assay [24].

CR sequences were generated by direct DNA sequencing between nucleotide positions (np) 16024 and 526 for all juvenile groups (STYJOBS/EDECTA and URSPRUNG) and between np 16145 and 509 for the adult SAPHIR cohort. Polymerase chain reaction and sequencing was performed as described previously [25]. Data were analyzed with Chromas software 1.56 (Technelysium, Tewantin, Australia) and alignment was conducted with Blast 2 software (bl2seq) (<http://blast.ncbi.nlm.nih.gov/Blast.cgi>). The Cambridge Revised sequence was used as a reference (GenBank accession number J01415).

## Statistical analysis

Frequencies of all mitochondrial haplogroups and CR polymorphisms were tested for independence for the disease using a non-parametric Mann-Whitney-U test as appropriate. Only haplogroups and polymorphisms with a frequency  $\geq 5\%$  in either the obese or the control group were subjected to further statistical analysis. P-values were corrected for multiple comparison using Bonferroni analysis (required level of significance =  $0.05/\text{number of comparisons}$ ), leading to a new required significance level of  $< 0.005$  for analysis of mitochondrial haplogroups [number of comparisons = 10]. The respective level of significance for analysis of CR polymorphisms was  $< 0.0003$  for the STYJOBS/EDECTA juvenile obese group [number of comparisons = 192] and  $< 0.0002$  for the SAPHIR adult obese group [number of comparisons = 333]. Additionally, logistic regression analysis was applied to adjust for possible confounders (sex and age).

The following clinical and biochemical variables were analyzed in the juvenile obese group for association with specific mtDNA haplogroups or CR polymorphisms: BMI, BMI standard deviation score (BMI sds), diastolic blood pressure, systolic blood pressure, blood glucose concentration, insulin resistance (HOMA-Homeostasis Model Assessment), triglycerides (TGs), low-density lipoprotein-cholesterol (LDL), high-density lipoprotein-cholesterol (HDL), waist-to-hip ratio (WHR), body fat percentage, birthweight, BMI of mother, fasting insulin, ultra-sensitive C-reactive protein (CRP), adiponectin, intima-media thickness (IMT), family history of diabetes mellitus type 2, family history of hypertension, family history of myocardial infarction (MI) and family history of stroke.

For the SAPHIR study group the following variables were available: BMI, blood glucose concentration, fasting insulin, insulin resistance (HOMA-Homeostasis Model Assessment), waist circumference (WC), hip circumference (HC), visceral adipose tissue (VAT), subcutaneous adipose tissue (SAT), body fat percentage, lean body mass (LBM), ultra-sensitive C-reactive protein (CRP) and adiponectin.

ANOVA was used to compare metabolic parameters in the different mtDNA haplogroups. To test for an association between clinical and biochemical parameters and presence of a specific mtDNA haplogroup or CR polymorphism, an independent sample t-test (for normally distributed variables) or a non-parametric Mann-Whitney U-test was performed. The Kolmogorov-Smirnov test was used to check for normality.

All analyses were performed using PASW 18.0 (SPSS GmbH, Germany).

## Results

The clinical characteristics of all study groups are shown in [Table 2](#).

### mtDNA haplogroup T is overrepresented in overweight/obese children and overweight/obese adults

**1. Juvenile cohort (STYJOBS/EDECTA).** The frequency of the T haplogroup was higher in the obese group compared to the URSPRUNG age-matched control group [11.7% in obese vs. 6.4% in controls,  $p = 0.036$ ] ([Table 3](#)), however not reaching the required level of significance

**Table 3. Frequencies (%) of Caucasian mitochondrial haplogroups in juvenile obesity cases and controls.**

| mtDNA haplogroup    | Frequency (%) in STYJOBS/ EDECTA <sup>3</sup> | n <sup>1</sup> | Frequency (%) in URSPRUNG <sup>4</sup> | n <sup>1</sup> |
|---------------------|-----------------------------------------------|----------------|----------------------------------------|----------------|
| H                   | 42.4                                          | 105            | 44.7                                   | 119            |
| U                   | 16.9                                          | 42             | 14.7                                   | 39             |
| J                   | 9.3                                           | 23             | 12.0                                   | 32             |
| T                   | 11.7                                          | 29             | 6.4                                    | 17             |
| K                   | 2.8                                           | 7              | 3.8                                    | 10             |
| W                   | 0.0                                           | 0              | 1.1                                    | 3              |
| V                   | 3.6                                           | 9              | 3.0                                    | 8              |
| I                   | 1.2                                           | 3              | 1.5                                    | 4              |
| X                   | 2.8                                           | 7              | 3.4                                    | 9              |
| Others <sup>2</sup> | 9.3                                           | 23             | 9.4                                    | 25             |

n<sup>1</sup> = Number of individuals with respective mtDNA haplogroup.

<sup>2</sup>Haplogroups that could not be assigned to one of the nine major European haplogroups by the SNP combination.

<sup>3</sup>Juvenile obese cohort 1

<sup>4</sup>Juvenile control cohort

doi:10.1371/journal.pone.0135622.t003

for multiple testing of  $<0.005$ . The frequencies of all other major mitochondrial haplogroups were not different.

**2. Adult cohort (SAPHIR).** In the overweight and obese adult subjects, haplogroup T was again found at a higher frequency than in the normal weight group (Table 4) [9.7% vs. 6.2%,  $p = 0.016$ ]. None of the other haplogroups showed a possible association with obesity.

**3. All juvenile and adult obese subjects.** When all ( $n = 1251$ ) were compared to the controls of all age groups ( $n = 861$ ), the higher frequency of haplogroup T in the obese subjects was significant and remained robust after adjustment for sex and age and correction for multiple testing [10.1% vs. 6.3%,  $p = 0.002$ , OR (95% CI) 1.68 (1.2–2.3)].

### CR polymorphisms in obese/overweight subjects

mtDNA D-loop variants of all 514 juvenile samples were investigated by direct sequencing of a 1066-bp fragment between np 16024 and 526. In 1598 adult samples, sequences were analyzed between np 16145 and 509. Only CR polymorphisms with a frequency  $\geq 5\%$  in either controls or cases were deemed to be relevant and analyzed further.

**1. Juvenile cohort (STYJOBS/EDECTA).** In the Austrian juvenile obese cohort, we detected 192 homoplasmic polymorphisms (Table A in S1 File), six of which were not listed in either Genbank ([www.ncbi.nlm.nih.gov/genbank](http://www.ncbi.nlm.nih.gov/genbank)), Phylotree ([www.phylotree.org](http://www.phylotree.org)) or MITO-MAP ([www.mitomap.org/MITOMAP](http://www.mitomap.org/MITOMAP)) [26]. In detail, we found 175 single base-pair exchanges, six single base-pair deletions and three single base-pair insertions, compared to the revised Cambridge Reference Sequence. At position 302 both single C-insertions and multiple C-insertions (2–4 Cs) were detected. Furthermore, we detected a TC-insertion at position 310. CA- and CACA-insertions were observed at position 513, whereas CA-deletions occurred at positions 514 and 515.

Thirty-nine of the 192 homoplasmic polymorphisms detected were found at a frequency  $\geq 5\%$  in either the obese or the control (URSPRUNG) subjects (Table 5) and were subjected to further statistical analysis. The frequencies of the C16294T, C16296T, G16526A, and A263G substitution were higher in the STYJOBS/EDECTA group than in the controls, whereas the T146C substitution was detected at a lower frequency in obese subjects. However, statistical significance was lost after correction for multiple testing.

**Table 4. Frequencies (%) of Caucasian mitochondrial haplogroups in adult obesity cases and controls.**

| mtDNA haplogroup    | Frequency (%) in overweight/obese SAPHIR <sup>3</sup> (BMI>25) | n <sup>1</sup> | Frequency (%) in normal weight SAPHIR <sup>3</sup> (BMI≤25) | n <sup>1</sup> |
|---------------------|----------------------------------------------------------------|----------------|-------------------------------------------------------------|----------------|
| H                   | 44.0                                                           | 441            | 44.0                                                        | 262            |
| U                   | 14.2                                                           | 142            | 17.0                                                        | 101            |
| J                   | 10.8                                                           | 108            | 11.8                                                        | 70             |
| T                   | 9.7                                                            | 97             | 6.2                                                         | 37             |
| K                   | 5.3                                                            | 53             | 5.7                                                         | 34             |
| W                   | 2.2                                                            | 22             | 1.8                                                         | 11             |
| V                   | 1.7                                                            | 17             | 1.7                                                         | 10             |
| I                   | 0.9                                                            | 9              | 1.0                                                         | 6              |
| X                   | 1.8                                                            | 18             | 0.8                                                         | 5              |
| Others <sup>2</sup> | 9.6                                                            | 96             | 9.9                                                         | 59             |

n<sup>1</sup> = Number of individuals with respective mtDNA haplogroup.

<sup>2</sup> Haplogroups that could not be assigned to one of the nine major European haplogroups by the SNP combination.

<sup>3</sup> Adult cohort

doi:10.1371/journal.pone.0135622.t004

**Table 5. Frequencies (%) of CR polymorphisms higher than 5% in either juvenile obese Austrians (STYJOBS/EDECTA) or juvenile controls (URSPRUNG) and odds ratios (OR) for the association between genetic variation and disease state.**

| mtDNA CR polymorphism      | Frequency in STYJOBS/EDCTA (%) | n <sup>1</sup> | Frequency in URSPRUNG (%) | n <sup>1</sup> | p-value <sup>2</sup> | OR <sup>3</sup> (95%CI <sup>4</sup> ) | p-value <sup>5</sup> | OR (95%CI) <sup>5</sup> |
|----------------------------|--------------------------------|----------------|---------------------------|----------------|----------------------|---------------------------------------|----------------------|-------------------------|
| C16069T                    | 9.3                            | 23             | 11.3                      | 30             | 0.456                |                                       |                      |                         |
| T16093C                    | 3.6                            | 9              | 6.4                       | 17             | 0.154                |                                       |                      |                         |
| T16126C                    | 21.8                           | 54             | 20.7                      | 55             | 0.761                |                                       |                      |                         |
| G16145A                    | 2.4                            | 6              | 5.3                       | 14             | 0.096                |                                       |                      |                         |
| A16183C                    | 7.7                            | 19             | 8.3                       | 22             | 0.799                |                                       |                      |                         |
| T16189C                    | 19.8                           | 49             | 19.5                      | 52             | 0.952                |                                       |                      |                         |
| Uninterrupted poly-C tract | 14.9                           | 37             | 15.8                      | 42             | 0.785                |                                       |                      |                         |
| C16192T                    | 6.9                            | 17             | 5.6                       | 15             | 0.569                |                                       |                      |                         |
| C16223T                    | 7.3                            | 18             | 8.6                       | 23             | 0.562                |                                       |                      |                         |
| T16224C                    | 3.2                            | 8              | 6.4                       | 17             | 0.096                |                                       |                      |                         |
| C16256T                    | 5.2                            | 13             | 4.9                       | 13             | 0.855                |                                       |                      |                         |
| C16261T                    | 3.6                            | 9              | 6.8                       | 18             | 0.111                |                                       |                      |                         |
| C16270T                    | 10.5                           | 26             | 9.8                       | 26             | 0.790                |                                       |                      |                         |
| C16294T                    | 12.9                           | 32             | 6.4                       | 17             | 0.012                | 2.17 (1.2–4.0)                        | 0.052                | 2.18 (1.0–4.8)          |
| C16296T                    | 6.5                            | 16             | 1.9                       | 5              | 0.009                | 3.60 (1.3–10.0)                       | 0.278                | 1.92 (0.6–6.3)          |
| T16298C                    | 6.9                            | 17             | 4.1                       | 11             | 0.175                |                                       |                      |                         |
| T16304C                    | 10.9                           | 27             | 6.8                       | 18             | 0.099                |                                       |                      |                         |
| T16311C                    | 10.1                           | 25             | 15.0                      | 40             | 0.091                |                                       |                      |                         |
| T16356C                    | 7.3                            | 18             | 6.4                       | 17             | 0.697                |                                       |                      |                         |
| T16362C                    | 11.3                           | 28             | 8.3                       | 22             | 0.249                |                                       |                      |                         |
| T16519C                    | 60.1                           | 149            | 58.3                      | 155            | 0.677                |                                       |                      |                         |
| G16526A                    | 6.5                            | 16             | 1.5                       | 4              | 0.004                | 4.52 (1.5–13.7)                       | 0.028                | 5.10 (1.2–21.8)         |
| A73G                       | 52.4                           | 130            | 51.9                      | 138            | 0.903                |                                       |                      |                         |
| T146C                      | 5.2                            | 13             | 11.3                      | 30             | 0.014                | 0.44 (0.2–0.9)                        | 0.079                | 0.46 (0.2–1.1)          |
| C150T                      | 9.7                            | 24             | 12.0                      | 32             | 0.393                |                                       |                      |                         |
| T152C                      | 19.4                           | 48             | 23.7                      | 63             | 0.234                |                                       |                      |                         |
| G185A                      | 5.2                            | 13             | 5.6                       | 15             | 0.843                |                                       |                      |                         |
| T195C                      | 17.7                           | 44             | 19.2                      | 51             | 0.676                |                                       |                      |                         |
| G228A                      | 8.1                            | 20             | 5.6                       | 15             | 0.276                |                                       |                      |                         |
| A263G                      | 100.0                          | 248            | 97.7                      | 260            | 0.017                | 0.98 (0.96–1.0)                       |                      |                         |
| C295T                      | 8.1                            | 20             | 12.4                      | 33             | 0.106                |                                       |                      |                         |
| A302C-Ins                  | 42.3                           | 105            | 43.6                      | 116            | 0.772                |                                       |                      |                         |
| A302CC-Ins                 | 14.1                           | 35             | 12.0                      | 32             | 0.484                |                                       |                      |                         |
| T310C-Ins                  | 98.0                           | 243            | 95.5                      | 254            | 0.114                |                                       |                      |                         |
| C456T                      | 5.6                            | 14             | 4.5                       | 12             | 0.427                |                                       |                      |                         |
| C462T                      | 6.9                            | 17             | 6.8                       | 18             | 0.968                |                                       |                      |                         |
| T489C                      | 9.7                            | 24             | 12.4                      | 33             | 0.325                |                                       |                      |                         |
| G513CA-Ins                 | 6.5                            | 16             | 4.5                       | 12             | 0.333                |                                       |                      |                         |
| C514Del                    | 11.7                           | 29             | 9.0                       | 24             | 0.320                |                                       |                      |                         |
| A515Del                    | 11.7                           | 29             | 9.0                       | 24             | 0.320                |                                       |                      |                         |

<sup>1</sup>n: number of individuals with the respective polymorphism.

<sup>2</sup> p-value: derived from Mann-Whitney-U test.

<sup>3</sup> OR: Odds Ratio

<sup>4</sup> CI: Confidence Interval

<sup>5</sup> adjusted for sex and age

doi:10.1371/journal.pone.0135622.t005

**2. Adult cohort (SAPHIR).** Among the overweight and obese subjects of the SAPHIR study, 333 homoplasmic polymorphisms were detected (Table B in [S1 File](#)). Seventeen of these polymorphisms were not listed in either GeneBank, Phylotree or MITOMAP. We discovered 314 single base-pair exchanges, ten single base-pair deletions and five single base-pair insertions, compared to the revised Cambridge Reference Sequence. At position 302, again multiple C-insertions (2–3 Cs) could be found. Furthermore, we detected a TC- and a TCC-insertion at position 310.

Twenty-seven of the 333 homoplasmic polymorphisms were present at a frequency  $\geq 5\%$  in either the overweight and obese SAPHIR subjects or the normal weight SAPHIR subjects (Table 6) and were subjected to further statistical analysis. The frequency of the T haplogroup marker C16294T was higher [ $p = 0.008$ , OR (95% CI) 1.68 (1.1–2.5), after adjustment for sex and age] therefore nearly reaching significance after correction for multiple testing. In contrast, the frequency of the G228A substitution was lower in the overweight and obese SAPHIR subjects compared to the normal weight controls [ $p = 0.042$ , OR (95% CI) 0.65 (0.4–1.0), after adjustment for sex and age].

## Analysis of clinical and biochemical parameters

General and biochemical characteristics of the study populations are shown in Table C in [S1 File](#). No association of relevant metabolic and cardiovascular parameters with a specific mtDNA haplogroup or CR polymorphism in any of the obese groups could be detected.

## Discussion

In the past five years, several studies have reported contradictory findings regarding the contribution that the mitochondrial genotype may make to pediatric and adult obesity (Table 1).

Here we report our results of the first age-matched comparative cohort study of juvenile obesity to analyze mtDNA haplogroups as well as CR polymorphisms. As the quality of the sampling procedure can have an impact on the qualitative and quantitative results obtained from the analysis of mtDNA [27], and because mtDNA shows striking regional variation [14, 28, 29], we placed our emphasis on a juvenile study group as homogeneous as possible. Furthermore, mtDNA haplogroups and CR polymorphisms as possible risk factors for obesity were analyzed in a well-characterized adult study group.

Haplogroup T was overrepresented in the obese juveniles, although the association was not significant after adjustment for multiple testing [ $p = 0.036$ ]. However, this tendency of haplogroup T to be more frequent in obese subjects is supported by data from the Austrian SAPHIR adult study group: the frequency of haplogroup T was higher in the adult overweight and obese subjects than in the normal weight controls [ $p = 0.016$ ], however not reaching the required level of significance for multiple testing of  $< 0.005$ . When all juvenile and adult obese subjects ( $n = 1251$ ) were compared to the controls of all age groups ( $n = 861$ ), a potential association of haplogroup T and obesity was even more pronounced [ $p = 0.002$ , OR (95% CI) 1.68 (1.2–2.3)].

The presented data are in agreement with the results of Nardelli et al. [9], who analyzed an ethnically and geographically homogenous (Italian) study group (obese patients  $n = 500$ ; controls  $n = 216$ ) similar to that in our study. In addition to finding an elevation of the T haplogroup frequency in their obese subjects, Nardelli et al. also observed a tendency for underrepresentation of haplogroup J in the same obese cohort. This is an interesting observation, as mitochondrial haplogroup J and T form a cluster with shared polymorphisms (e.g. mtDNA T4216C) and were formerly described as sister haplogroups with a common root [30]. Our results contradict those of Knoll et al. [8], who found no association of mtDNA haplogroups



**Table 6. Frequencies (%) of CR polymorphisms higher than 5% in either overweight and obese or normal weight adults (both SAPHIR cohort) and odds ratios (OR) for the association between genetic variation and disease state.**

| mtDNA CR polymorphism      | Frequency in overweight and obese SAPHIR (%) | n <sup>1</sup> | Frequency in lean and normal weight SAPHIR (%) | n <sup>1</sup> | p-value <sup>2</sup> | OR <sup>3</sup> (95%CI <sup>4</sup> ) | p-value <sup>5</sup> | OR (95% CI) <sup>5</sup> |
|----------------------------|----------------------------------------------|----------------|------------------------------------------------|----------------|----------------------|---------------------------------------|----------------------|--------------------------|
| T16189C                    | 11.7                                         | 117            | 12.3                                           | 73             | 0.719                |                                       |                      |                          |
| Uninterrupted poly-C tract | 9.2                                          | 92             | 9.4                                            | 56             | 0.873                |                                       |                      |                          |
| C16192T                    | 5.4                                          | 54             | 7.1                                            | 42             | 0.173                |                                       |                      |                          |
| C16223T                    | 6.1                                          | 61             | 5.9                                            | 35             | 0.871                |                                       |                      |                          |
| T16224C                    | 7.2                                          | 72             | 8.7                                            | 52             | 0.260                |                                       |                      |                          |
| C16256T                    | 6.3                                          | 63             | 5.9                                            | 35             | 0.748                |                                       |                      |                          |
| C16270T                    | 7.7                                          | 77             | 8.1                                            | 48             | 0.776                |                                       |                      |                          |
| C16294T                    | 10.6                                         | 106            | 6.7                                            | 40             | 0.010                | 1.64 (1.1–2.4)                        | 0.008                | 1.68 (1.1–2.5)           |
| C16296T                    | 6.9                                          | 69             | 4.7                                            | 28             | 0.079                | 1.50 (1.0–2.3)                        | 0.098                | 1.47 (0.9–2.3)           |
| T16304C                    | 7.9                                          | 79             | 7.7                                            | 46             | 0.917                |                                       |                      |                          |
| T16311C                    | 13.1                                         | 131            | 15.1                                           | 90             | 0.248                |                                       |                      |                          |
| T16356C                    | 3.7                                          | 37             | 5.0                                            | 30             | 0.192                |                                       |                      |                          |
| T16362C                    | 6.9                                          | 69             | 6.7                                            | 40             | 0.904                |                                       |                      |                          |
| T16519C                    | 66.8                                         | 670            | 64.7                                           | 385            | 0.393                |                                       |                      |                          |
| A73G                       | 53.9                                         | 541            | 54.8                                           | 326            | 0.741                |                                       |                      |                          |
| T146C                      | 9.2                                          | 92             | 9.2                                            | 55             | 0.962                |                                       |                      |                          |
| C150T                      | 10.6                                         | 106            | 12.4                                           | 74             | 0.254                |                                       |                      |                          |
| T152C                      | 22.8                                         | 229            | 22.5                                           | 134            | 0.886                |                                       |                      |                          |
| G185A                      | 5.5                                          | 55             | 6.1                                            | 36             | 0.637                |                                       |                      |                          |
| T195C                      | 16.9                                         | 170            | 17.3                                           | 103            | 0.853                |                                       |                      |                          |
| G228A                      | 5.3                                          | 53             | 7.4                                            | 44             | 0.088                | 0.70 (0.5–1.1)                        | 0.042                | 0.65 (0.4–1.0)           |
| A263G                      | 98.9                                         | 992            | 98.7                                           | 587            | 0.659                |                                       |                      |                          |
| C295T                      | 10.1                                         | 101            | 10.8                                           | 64             | 0.667                |                                       |                      |                          |
| A302C-Ins                  | 39.2                                         | 393            | 36.5                                           | 217            | 0.281                |                                       |                      |                          |
| A302CC-Ins                 | 11.7                                         | 117            | 11.8                                           | 70             | 0.952                |                                       |                      |                          |
| T310C-Ins                  | 97.3                                         | 976            | 96.1                                           | 572            | 0.193                |                                       |                      |                          |
| C462T                      | 8.1                                          | 81             | 8.7                                            | 52             | 0.643                |                                       |                      |                          |
| T489C                      | 11.3                                         | 113            | 11.9                                           | 71             | 0.687                |                                       |                      |                          |

<sup>1</sup>n: number of individuals with the respective polymorphism.

<sup>2</sup> p-value: derived from Mann-Whitney-U test.

<sup>3</sup> OR: Odds Ratio

<sup>4</sup> CI: Confidence Interval

<sup>5</sup> adjusted for sex and age

doi:10.1371/journal.pone.0135622.t006

and obesity. However, it should be noted that the cases and control subjects of the Knoll study were either of French or German ancestry [31]; therefore, differences of geographic origin might account for the different results of the two studies. Indeed, as early as 1996, Torroni et al. pointed out that certain variants and haplogroups can be common in certain populations and absent in other ethnic groups [28]. Consequently, those authors postulated that mtDNA disease studies require control populations that are accurately ethnically matched to the background of the patients. This was further supported by studies in Ashkenazi Jewish individuals

demonstrating the need to take population substructure into account when designing association studies [29].

Previously, haplotype T was reported to be a risk factor for multifactorial disorders such as coronary artery disease and diabetic retinopathy [22]. Furthermore, the T haplogroup has been shown to be negatively associated with elite endurance training [32]. There is evidence that different mtDNA haplogroups are associated with subtle differences in OXPHOS capacity and generation of reactive oxygen species (ROS), which may have functional consequences [33–36]. Our data suggest that there is a population-specific association of mtDNA haplogroup T with obesity in Middle European Caucasians, although it still has to be elucidated whether there is a functional association between haplogroup T and the phenotype.

Although most mitochondrial polymorphisms are believed to be neutral, population-specific mtDNAs may be functionally different and exert varying influences on the outcome of a disease [13]. Different combinations of certain mtDNA variants might, in a synergistic way, influence the susceptibility of certain haplogroups to disease by causing differences in energy production. Variants of the non-coding CR of mtDNA are of particular interest because they may affect mtDNA transcription and replication and therefore may contribute to the etiology of a disease. Herein, we evaluated CR polymorphisms with a frequency  $\geq 5\%$  and their possible role as risk factors for juveniles and adults. Most interestingly, the frequency of the C16294T mutation was elevated in the two obese groups compared to the controls. This can be explained by the fact that C16294T is a haplotype T marker and therefore is linked to an increased frequency of haplogroup T in the obese subjects. Similarly, the subhaplogroup T2 marker C16296T was detected more frequently in our juvenile obese cohort but not in the adult obese cohort.

Knoll et al. reported a higher frequency of the polymorphism T16189C among extremely obese cases (17% vs. 9%) [8]. This variant would give rise to an uninterrupted poly-C tract from np 16184 to 16193 and possibly lead to heteroplasmic length variation of different mtDNA molecules within the same person [37]. The polymorphism T16189C has been described to be associated with other multifactorial diseases, including type 2 diabetes mellitus [20, 38], coronary artery disease [20] and metabolic syndrome [39, 40]. In contrast to the results of Knoll et al., the 16189 variant has been reported to be associated with thinness in 161 Australian mothers and their 20-yr-old offspring. [41]. In the present study, we did not detect an association of the 16189 variant with obesity or BMI. On the contrary, we even detected a trend of lower T16189C frequencies in obese subjects compared to controls.

We further looked for potential correlations of certain mtDNA haplogroups or CR polymorphisms with obesity-relevant metabolic and cardiovascular parameters. However, no mtDNA variant was robustly associated with any of the investigated metabolic and cardiovascular parameters in both the obese juvenile cohort and the adult obese cohort. Nor could we confirm the results of Yang et al., who reported an association of haplogroup X with lower BMI and body fat mass in a sample of unrelated Northern European Caucasians [6]. Saxena and coworkers, as well, did not find any significant association of common mtDNA variants (except CR polymorphisms) with metabolic phenotypes in five analyzed ethnicities [42]. Due to the lack of association with obesity-related clinical markers it is tempting to hypothesize directionality from the mitochondrial variants to the obese phenotype, rather than the reverse causal directionality.

There are study limitations that need to be acknowledged. Firstly, since the data of the adult study group were taken from a previous study, our study design was post-hoc. However, analyzing both the juvenile and the adult subjects together had the advantage to increase the number of samples as it is widely recognized that small sample sizes do have limited study power [43]. However, a potential predictive value of haplogroup T for weight gain and/or obesity-

related morbidity warrants further evaluation in a longitudinal study design. Further, as mentioned above, geographic and ethnic homogeneity is key to mitochondrial genetic studies. Thus, the current study particularly strived to ensure regional and ethnical homogeneity.

In summary, our study found the frequencies of mitochondrial haplogroup T and a linked D-loop variant (C16294T) to be elevated in a juvenile obese cohort and an adult obese cohort of Middle European ancestry. However, the frequency of the subhaplogroup T2 marker C16296T was elevated only in the juvenile cohort, but not in the adult group. No association of certain mtDNA haplogroups or CR polymorphisms with relevant metabolic and cardiovascular parameters could be detected. In conclusion, our data suggest that there is a population-specific association of mtDNA haplogroup T with obesity in Middle European Caucasians.

## Supporting Information

**S1 File. Table A. CR polymorphisms of juvenile obese cohort 1 (STYJOBS/EDECTA). Table B. CR polymorphisms of the adult obese cohort (SAPHIR). Table C. General and biochemical characteristics of the study populations.**  
(DOCX)

## Author Contributions

Conceived and designed the experiments: SE BK DW WS. Performed the experiments: SE HM HL MS EA KP CD BP. Analyzed the data: SE KP BK DW. Contributed reagents/materials/analysis tools: HM HL MH MS EA BP CD WS DW. Wrote the paper: SE DW BK.

## References

1. Ramachandrapa S, Farooqi IS. Genetic approaches to understanding human obesity. *J Clin Invest* 2011; 121: 2080–2086. doi: [10.1172/JCI46044](https://doi.org/10.1172/JCI46044) PMID: [21633175](https://pubmed.ncbi.nlm.nih.gov/21633175/)
2. Naukkarinen J, Heinonen S, Hakkarainen A, Lundbom J, Vuolteenaho K, Saarinen L, et al. Characterising metabolically healthy obesity in weight-discordant monozygotic twins. *Diabetologia* 2014; 57: 167–176. doi: [10.1007/s00125-013-3066-y](https://doi.org/10.1007/s00125-013-3066-y) PMID: [24100782](https://pubmed.ncbi.nlm.nih.gov/24100782/)
3. Pietilainen KH, Naukkarinen J, Rissanen A, Saharinen J, Ellonen P, Keranen H, et al. Global transcript profiles of fat in monozygotic twins discordant for BMI: pathways behind acquired obesity. *PLoS Med* 2008; 5: e51. doi: [10.1371/journal.pmed.0050051](https://doi.org/10.1371/journal.pmed.0050051) PMID: [18336063](https://pubmed.ncbi.nlm.nih.gov/18336063/)
4. Wortmann SB, Zweers-van Essen H, Rodenburg RJ, van den Heuvel LP, de Vries MC, Rasmussen-Conrad E, et al. Mitochondrial energy production correlates with the age-related BMI. *Pediatr Res* 2009; 65: 103–108. doi: [10.1203/PDR.0b013e31818d1c8a](https://doi.org/10.1203/PDR.0b013e31818d1c8a) PMID: [19096353](https://pubmed.ncbi.nlm.nih.gov/19096353/)
5. Mustelin L, Pietilainen KH, Rissanen A, Sovijarvi AR, Piirila P, Naukkarinen J, et al. Acquired obesity and poor physical fitness impair expression of genes of mitochondrial oxidative phosphorylation in monozygotic twins discordant for obesity. *Am J Physiol Endocrinol Metab* 2008; 295: E148–154. doi: [10.1152/ajpendo.00580.2007](https://doi.org/10.1152/ajpendo.00580.2007) PMID: [18460597](https://pubmed.ncbi.nlm.nih.gov/18460597/)
6. Yang TL, Guo Y, Shen H, Lei SF, Liu YJ, Li J, et al. Genetic association study of common mitochondrial variants on body fat mass. *PLoS One* 2011; 6: e21595. doi: [10.1371/journal.pone.0021595](https://doi.org/10.1371/journal.pone.0021595) PMID: [21747914](https://pubmed.ncbi.nlm.nih.gov/21747914/)
7. Grant SF, Glessner JT, Bradfield JP, Zhao J, Tirone JE, Berkowitz RI, et al. Lack of relationship between mitochondrial heteroplasmy or variation and childhood obesity. *Int J Obes (Lond)* 2012; 36: 80–83.
8. Knoll N, Jarick I, Volckmar AL, Klingenspor M, Illig T, Grallert H, et al. Mitochondrial DNA variants in obesity. *PLoS One* 2014; 9: e94882. doi: [10.1371/journal.pone.0094882](https://doi.org/10.1371/journal.pone.0094882) PMID: [24788344](https://pubmed.ncbi.nlm.nih.gov/24788344/)
9. Nardelli C, Labruna G, Liguori R, Mazzaccara C, Ferrigno M, Capobianco V, et al. Haplogroup T is an obesity risk factor: mitochondrial DNA haplotyping in a morbid obese population from southern Italy. *Biomed Res Int* 2013; 2013: 631082. doi: [10.1155/2013/631082](https://doi.org/10.1155/2013/631082) PMID: [23936828](https://pubmed.ncbi.nlm.nih.gov/23936828/)
10. Hatzfeld JJ, LaVeist TA, Gaston-Johansson FG. Racial/ethnic disparities in the prevalence of selected chronic diseases among US Air Force members, 2008. *Prev Chronic Dis* 2012; 9: E112. PMID: [22698173](https://pubmed.ncbi.nlm.nih.gov/22698173/)

11. Kurian AK, Cardarelli KM. Racial and ethnic differences in cardiovascular disease risk factors: a systematic review. *Ethn Dis* 2007; 17: 143–152. PMID: [17274224](#)
12. Mensah GA, Mokdad AH, Ford ES, Greenlund KJ, Croft JB. State of disparities in cardiovascular health in the United States. *Circulation* 2005; 111: 1233–1241. PMID: [15769763](#)
13. Kenney MC, Chwa M, Atilano SR, Falatoonzadeh P, Ramirez C, Malik D, et al. Molecular and bioenergetic differences between cells with African versus European inherited mitochondrial DNA haplogroups: implications for population susceptibility to diseases. *Biochim Biophys Acta* 2014; 1842: 208–219. doi: [10.1016/j.bbadis.2013.10.016](#) PMID: [24200652](#)
14. Soto-Hermida A, Fernandez-Moreno M, Oreiro N, Fernandez-Lopez C, Rego-Perez I, Blanco FJ. mtDNA haplogroups and osteoarthritis in different geographic populations. *Mitochondrion* 2014; 15: 18–23. doi: [10.1016/j.mito.2014.03.001](#) PMID: [24632472](#)
15. Zelzer S, Fuchs N, Almer G, Raggam RB, Pruller F, Truschnig-Wilders M, et al. High density lipoprotein cholesterol level is a robust predictor of lipid peroxidation irrespective of gender, age, obesity, and inflammatory or metabolic biomarkers. *Clin Chim Acta* 2011; 412: 1345–1349. doi: [10.1016/j.cca.2011.03.031](#) PMID: [21515245](#)
16. Aigner E, Hinz C, Steiner K, Rossmann B, Pflieger J, Hohla F, et al. Iron stores, liver transaminase levels and metabolic risk in healthy teenagers. *Eur J Clin Invest* 2010; 40: 155–163. doi: [10.1111/j.1365-2362.2009.02238.x](#) PMID: [20050877](#)
17. Weitgasser R, Galvan G, Malaimare L, Derflinger I, Hedegger M, Lang J, et al. Cholesteryl ester transfer protein TaqIB polymorphism and its relation to parameters of the insulin resistance syndrome in an Austrian cohort. *Biomed Pharmacother* 2004; 58: 619–627. PMID: [15589073](#)
18. Mangge H, Summers KL, Meinitzer A, Zelzer S, Almer G, Prassl R, et al. Obesity-related dysregulation of the tryptophan-kynurenine metabolism: role of age and parameters of the metabolic syndrome. *Obesity (Silver Spring)* 2014; 22: 195–201.
19. Cole TJ, Bellizzi MC, Flegal KM, Dietz WH. Establishing a standard definition for child overweight and obesity worldwide: international survey. *BMJ* 2000; 320: 1240–1243. PMID: [10797032](#)
20. Mueller EE, Eder W, Ebner S, Schwaiger E, Santic D, Kreindl T, et al. The mitochondrial T16189C polymorphism is associated with coronary artery disease in Middle European populations. *PLoS One* 2011; 6: e16455. doi: [10.1371/journal.pone.0016455](#) PMID: [21298061](#)
21. Ebner S, Lang R, Mueller EE, Eder W, Oeller M, Moser A, et al. Mitochondrial haplogroups, control region polymorphisms and malignant melanoma: a study in middle European Caucasians. *PLoS One* 2011; 6: e27192. doi: [10.1371/journal.pone.0027192](#) PMID: [22174736](#)
22. Kofler B, Mueller EE, Eder W, Stanger O, Maier R, Weger M, et al. Mitochondrial DNA haplogroup T is associated with coronary artery disease and diabetic retinopathy: a case control study. *BMC Med Genet* 2009; 10: 35. doi: [10.1186/1471-2350-10-35](#) PMID: [19383124](#)
23. Wiesbauer M, Meierhofer D, Mayr JA, Sperl W, Paulweber B, Kofler B. Multiplex primer extension analysis for rapid detection of major European mitochondrial haplogroups. *Electrophoresis* 2006; 27: 3864–3868. PMID: [16960846](#)
24. Gabriel S, Ziaugra L, Tabbaa D. SNP genotyping using the Sequenom MassARRAY iPLEX platform. *Curr Protoc Hum Genet* 2009;Chapter 2: Unit 2 12.
25. Mueller EE, Eder W, Mayr JA, Paulweber B, Sperl W, Horninger W, et al. Mitochondrial haplogroups and control region polymorphisms are not associated with prostate cancer in Middle European Caucasians. *PLoS One* 2009; 4: e6370. doi: [10.1371/journal.pone.0006370](#) PMID: [19636411](#)
26. Ruiz-Pesini E, Lott MT, Procaccio V, Poole JC, Brandon MC, Mishmar D, et al. An enhanced MITOMAP with a global mtDNA mutational phylogeny. *Nucleic Acids Res* 2007; 35: D823–828. PMID: [17178747](#)
27. Dubut V, Chollet L, Murail P, Cartault F, Beraud-Colomb E, Serre M, et al. mtDNA polymorphisms in five French groups: importance of regional sampling. *Eur J Hum Genet* 2004; 12: 293–300. PMID: [14694359](#)
28. Torroni A, Huoponen K, Francalacci P, Petrozzi M, Morelli L, Scozzari R, et al. Classification of European mtDNAs from an analysis of three European populations. *Genetics* 1996; 144: 1835–1850. PMID: [8978068](#)
29. Feder J, Ovadia O, Glaser B, Mishmar D. Ashkenazi Jewish mtDNA haplogroup distribution varies among distinct subpopulations: lessons of population substructure in a closed group. *Eur J Hum Genet* 2007; 15: 498–500. PMID: [17245410](#)
30. Ruiz-Pesini E, Mishmar D, Brandon M, Procaccio V, Wallace DC. Effects of purifying and adaptive selection on regional variation in human mtDNA. *Science* 2004; 303: 223–226. PMID: [14716012](#)
31. Scherag A, Dina C, Hinney A, Vatin V, Scherag S, Vogel CI, et al. Two new Loci for body-weight regulation identified in a joint analysis of genome-wide association studies for early-onset extreme obesity in

- French and German study groups. *PLoS Genet* 2010; 6: e1000916. doi: [10.1371/journal.pgen.1000916](https://doi.org/10.1371/journal.pgen.1000916) PMID: [20421936](https://pubmed.ncbi.nlm.nih.gov/20421936/)
32. Castro MG, Terrados N, Reguero JR, Alvarez V, Coto E. Mitochondrial haplogroup T is negatively associated with the status of elite endurance athlete. *Mitochondrion* 2007; 7: 354–357. PMID: [17660050](https://pubmed.ncbi.nlm.nih.gov/17660050/)
  33. Rose G, Passarino G, Carrieri G, Altomare K, Greco V, Bertolini S, et al. Paradoxes in longevity: sequence analysis of mtDNA haplogroup J in centenarians. *Eur J Hum Genet* 2001; 9: 701–707. PMID: [11571560](https://pubmed.ncbi.nlm.nih.gov/11571560/)
  34. Ruiz-Pesini E, Lapena AC, Diez-Sanchez C, Perez-Martos A, Montoya J, Alvarez E, et al. Human mtDNA haplogroups associated with high or reduced spermatozoa motility. *Am J Hum Genet* 2000; 67: 682–696. PMID: [10936107](https://pubmed.ncbi.nlm.nih.gov/10936107/)
  35. Pyle A, Foltynie T, Tiangyou W, Lambert C, Keers SM, Allcock LM, et al. Mitochondrial DNA haplogroup cluster UKJT reduces the risk of PD. *Ann Neurol* 2005; 57: 564–567. PMID: [15786469](https://pubmed.ncbi.nlm.nih.gov/15786469/)
  36. Mueller EE, Brunner SM, Mayr JA, Stanger O, Sperl W, Kofler B. Functional differences between mitochondrial haplogroup T and haplogroup H in HEK293 cybrid cells. *PLoS One* 2012; 7: e52367. doi: [10.1371/journal.pone.0052367](https://doi.org/10.1371/journal.pone.0052367) PMID: [23300652](https://pubmed.ncbi.nlm.nih.gov/23300652/)
  37. Gill-Randall R, Sherratt EJ, Thomas AW, Gagg JW, Lee A, Alcolado JC. Analysis of a polycytosine tract and heteroplasmic length variation in the mitochondrial DNA D-loop of patients with diabetes, MELAS syndrome and race-matched controls. *Diabet Med* 2001; 18: 413–416. PMID: [11472454](https://pubmed.ncbi.nlm.nih.gov/11472454/)
  38. Park KS, Chan JC, Chuang LM, Suzuki S, Araki E, Nanjo K, et al. A mitochondrial DNA variant at position 16189 is associated with type 2 diabetes mellitus in Asians. *Diabetologia* 2008; 51: 602–608. doi: [10.1007/s00125-008-0933-z](https://doi.org/10.1007/s00125-008-0933-z) PMID: [18251004](https://pubmed.ncbi.nlm.nih.gov/18251004/)
  39. Weng SW, Liou CW, Lin TK, Wei YH, Lee CF, Eng HL, et al. Association of mitochondrial deoxyribonucleic acid 16189 variant (T->C transition) with metabolic syndrome in Chinese adults. *J Clin Endocrinol Metab* 2005; 90: 5037–5040. PMID: [15972579](https://pubmed.ncbi.nlm.nih.gov/15972579/)
  40. Palmieri VO, De Rasmio D, Signorile A, Sardanelli AM, Grattagliano I, Minerva F, et al. T16189C mitochondrial DNA variant is associated with metabolic syndrome in Caucasian subjects. *Nutrition* 2011; 27: 773–777. doi: [10.1016/j.nut.2010.08.016](https://doi.org/10.1016/j.nut.2010.08.016) PMID: [21146361](https://pubmed.ncbi.nlm.nih.gov/21146361/)
  41. Parker E, Phillips DI, Cockington RA, Cull C, Poulton J. A common mitochondrial DNA variant is associated with thinness in mothers and their 20-yr-old offspring. *Am J Physiol Endocrinol Metab* 2005; 289: E1110–E1114. PMID: [15998658](https://pubmed.ncbi.nlm.nih.gov/15998658/)
  42. Saxena R, de Bakker PI, Singer K, Mootha V, Burt N, Hirschhorn JN, et al. Comprehensive association testing of common mitochondrial DNA variation in metabolic disease. *Am J Hum Genet* 2006; 79: 54–61. PMID: [16773565](https://pubmed.ncbi.nlm.nih.gov/16773565/)
  43. Samuels DC, Carothers AD, Horton R, Chinnery PF. The power to detect disease associations with mitochondrial DNA haplogroups. *Am J Hum Genet* 2006; 78: 713–720. PMID: [16532401](https://pubmed.ncbi.nlm.nih.gov/16532401/)
